# Supplementary material for: Cascading One-Pot Synthesis of Biodegradable Uronic Acid-Based Surfactants from Oligoalginates, Semi-Refined Alginates, and Crude Brown Seaweeds
Source: MDPI journal article supplement (doi:10.3390/molecules28135201), 2023-07-04
Supplement: s1 [file s1]

## Supplementary Materials :

### Cascading One-opt Synthesis of Biodegradable Uronic Acid-based Surfactants from Oligoalginates, Semi-Refined Alginates and Crude Brown Seaweeds

Freddy Pessel, Guillaume Noirbent, Cédric Boyère, Sacha Pérocheau Arnaud, Tiphaine Wong, Laura Durand, and Thierry Benvegnu\*

#### Contents:

|                   |                                                                                                                                                                                                     |    |
|-------------------|-----------------------------------------------------------------------------------------------------------------------------------------------------------------------------------------------------|----|
| <b>Figure S1</b>  | $^1\text{H}$ NMR spectrum of <b>C<sub>4</sub>-C<sub>4</sub> Man</b> from OM ( $\delta$ : 7.2-0.6 ppm) (400 MHz, $\text{CDCl}_3$ )                                                                   | 3  |
| <b>Figure S2</b>  | Zooms of $^1\text{H}$ NMR spectrum of <b>C<sub>4</sub>-C<sub>4</sub> Man</b> from OM in the zones: (a) 7.2-5.5 ppm; (b) 5.16-4.68 ppm; (c) 4.50-3.60 ppm (400 MHz, $\text{CDCl}_3$ )                | 4  |
| <b>Figure S3</b>  | Zooms of $^1\text{H}$ NMR spectra of <b>fractions F1, F2 and F3</b> isolated after column chromatography of <b>C<sub>4</sub>-C<sub>4</sub> Man</b> from OM (400 MHz, $\text{CDCl}_3$ )              | 5  |
| <b>Figure S4</b>  | Zooms of $^1\text{H}$ NMR spectra of <b>fractions F4 and F5</b> isolated after column chromatography of <b>C<sub>4</sub>-C<sub>4</sub> Man</b> from OM (400 MHz, $\text{CDCl}_3$ )                  | 6  |
| <b>Figure S5</b>  | $^1\text{H}$ NMR spectrum of <b>C<sub>12</sub>-C<sub>12</sub> Man</b> from OM ( $\delta$ : 0.6 -2.2 ppm) (400 MHz, $\text{CDCl}_3$ )                                                                | 7  |
| <b>Figure S6</b>  | Zooms of $^1\text{H}$ NMR spectrum of <b>C<sub>12</sub>-C<sub>12</sub> Man</b> from OM in the zones: (a) 5.15-4.50 ppm; (b) 4.50-3.86 ppm (400 MHz, $\text{CDCl}_3$ )                               | 8  |
| <b>Figure S7</b>  | Zooms of $^1\text{H}$ NMR spectra of <b>fractions F1, F2 and F3</b> isolated after the second column chromatography of <b>C<sub>12</sub>-C<sub>12</sub> Man</b> from OM (400 MHz, $\text{CDCl}_3$ ) | 9  |
| <b>Figure S8</b>  | Zoom of $^1\text{H}$ NMR spectrum of <b>fraction F4</b> isolated after column chromatography of <b>C<sub>12</sub>-C<sub>12</sub> Man</b> from OM (400 MHz, $\text{CDCl}_3$ )                        | 10 |
| <b>Figure S9</b>  | $^1\text{H}$ NMR spectrum of <b>H-C<sub>12</sub> Man</b> from OM ( $\delta$ : 5.2-0.6 ppm) (400 MHz, $\text{CD}_3\text{OD}$ )                                                                       | 11 |
| <b>Figure S10</b> | Zooms of $^1\text{H}$ NMR spectrum of <b>H-C<sub>12</sub> Man</b> from OM in the zones: (a) 5.15-4.35 ppm; (b) 4.35-3.77ppm (400 MHz, $\text{CD}_3\text{OD}$ )                                      | 12 |
| <b>Figure S11</b> | $^1\text{H}$ NMR spectrum of <b>H-C<sub>12</sub> Gul</b> from OG ( $\delta$ : 5.2-0.6 ppm) (400 MHz, $\text{CD}_3\text{OD}$ )                                                                       | 13 |
| <b>Figure S12</b> | Zooms of $^1\text{H}$ NMR spectrum of <b>H-C<sub>12</sub> Gul</b> from OG in the zones: (a) 5.15-4.35 ppm; (b) 4.32-3.76 ppm (400 MHz, $\text{CD}_3\text{OD}$ )                                     | 14 |

|                    |                                                                                                                                                                                             |           |
|--------------------|---------------------------------------------------------------------------------------------------------------------------------------------------------------------------------------------|-----------|
| <b>Figure S13</b>  | $^1\text{H}$ NMR spectrum of <b>H-C<sub>12</sub> OAlg</b> from OAlg ( $\delta$ : 5.2-0.6 ppm) (400 MHz, CD <sub>3</sub> OD)                                                                 | <b>15</b> |
| <b>Figure S14:</b> | Zooms of $^1\text{H}$ NMR spectrum of <b>H-C<sub>12</sub> OAlg</b> from OAlg in the zones: (a) 5.15-4.35 ppm; (b) 4.32-3.74 ppm (400 MHz, CD <sub>3</sub> OD)                               | <b>16</b> |
| <b>Figure S15</b>  | $^1\text{H}$ NMR spectrum of <b>H-C<sub>12</sub> s-r Alg</b> from s-r Alg ( $\delta$ : 5.2-0.6 ppm) (400 MHz, acetone-d <sub>6</sub> )                                                      | <b>17</b> |
| <b>Figure S16</b>  | Zooms of $^1\text{H}$ NMR spectrum of <b>H-C<sub>12</sub> s-r Alg</b> from s-r Alg in the zones: (a) 5.10-4.40 ppm; (b) 4.34-3.81 ppm; (c) 1.75-0.80 ppm (400 MHz, acetone-d <sub>6</sub> ) | <b>18</b> |
| <b>Figure S17</b>  | $^1\text{H}$ NMR spectrum of <b>H-C<sub>8</sub> crude Alg</b> from crude Alg ( $\delta$ : 5.20-3.80 ppm) (400 MHz, CD <sub>3</sub> OD)                                                      | <b>19</b> |
| <b>Figure S18</b>  | Zoom of $^1\text{H}$ NMR spectrum of <b>H-C<sub>8</sub> crude Alg</b> from crude Alg in the zone 1.76-0.85 (400 MHz, CD <sub>3</sub> OD)                                                    | <b>19</b> |
| <b>Figure S19</b>  | Biodegradability results ( <b>H-C<sub>12</sub> s-r Alg</b> ) according to the OCDE 301 B method                                                                                             | <b>20</b> |
| <b>Figure S20</b>  | Biodegradability results ( <b>SLES</b> ) according to the OCDE 301 B method                                                                                                                 |           |

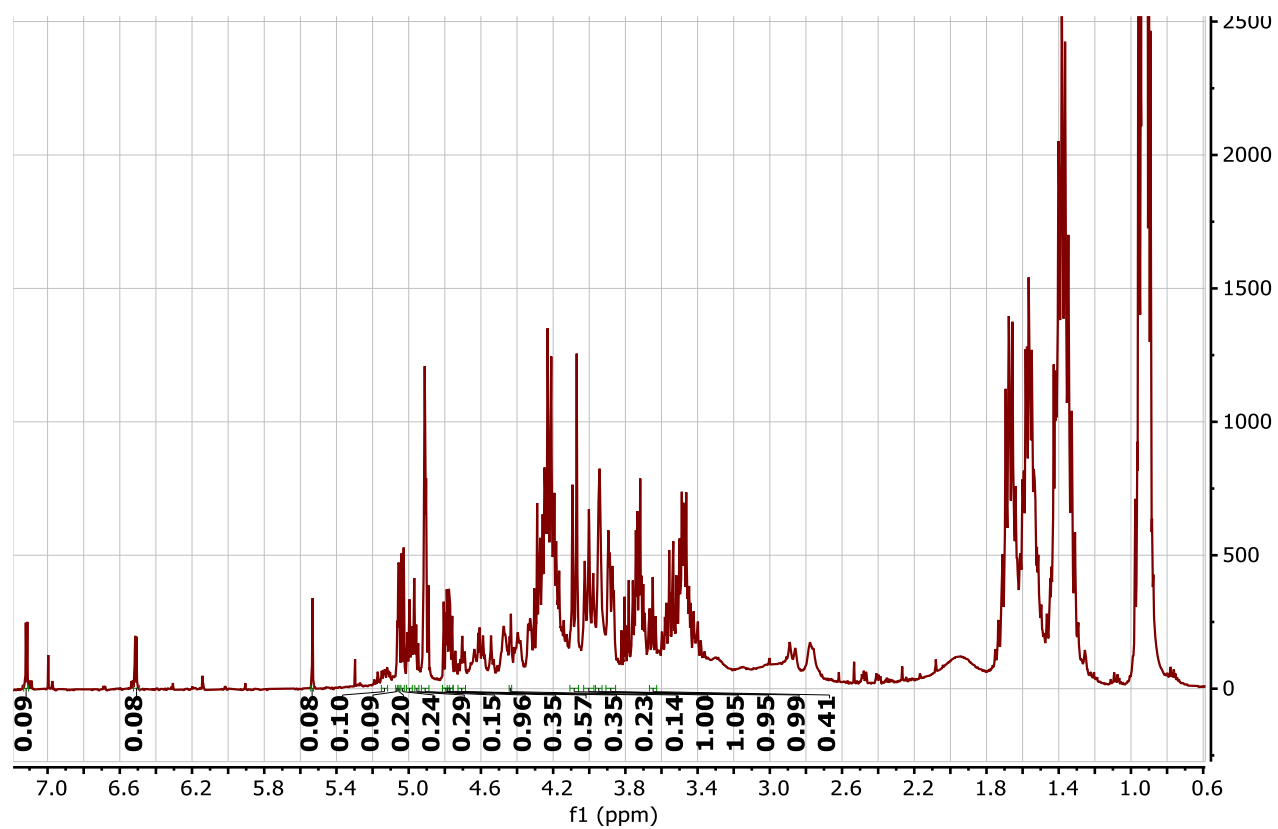

**Figure S1:**  $^1\text{H}$  NMR spectrum of C<sub>4</sub>-C<sub>4</sub> Man from OM ( $\delta$ : 7.2-0.6 ppm) (400 MHz,  $\text{CDCl}_3$ ).

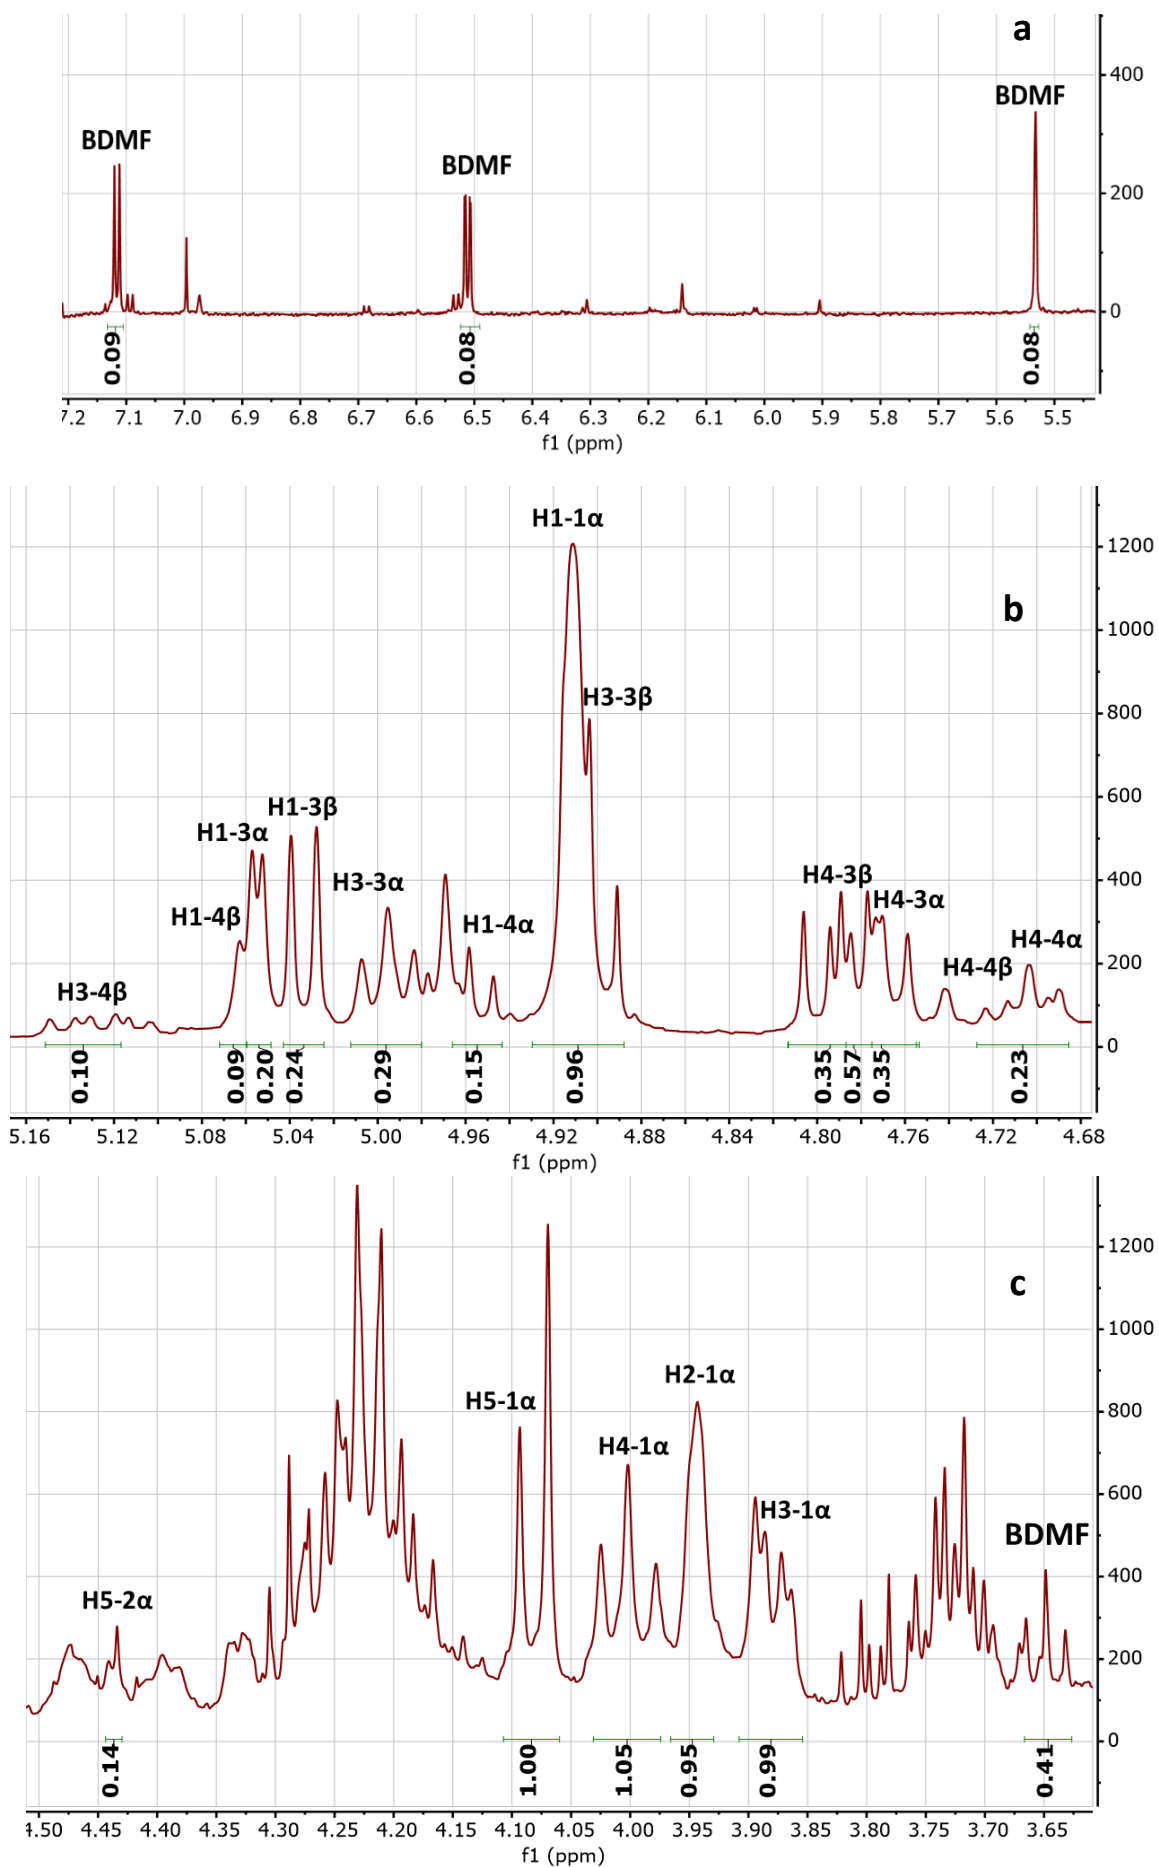

**Figure S2:** Zooms of  $^1\text{H}$  NMR spectrum of **C<sub>4</sub>-C<sub>4</sub> Man** from OM in the zones: (a) 7.2-5.5 ppm; (b) 5.16-4.68 ppm; (c) 4.50-3.60 ppm (400 MHz,  $\text{CDCl}_3$ ).

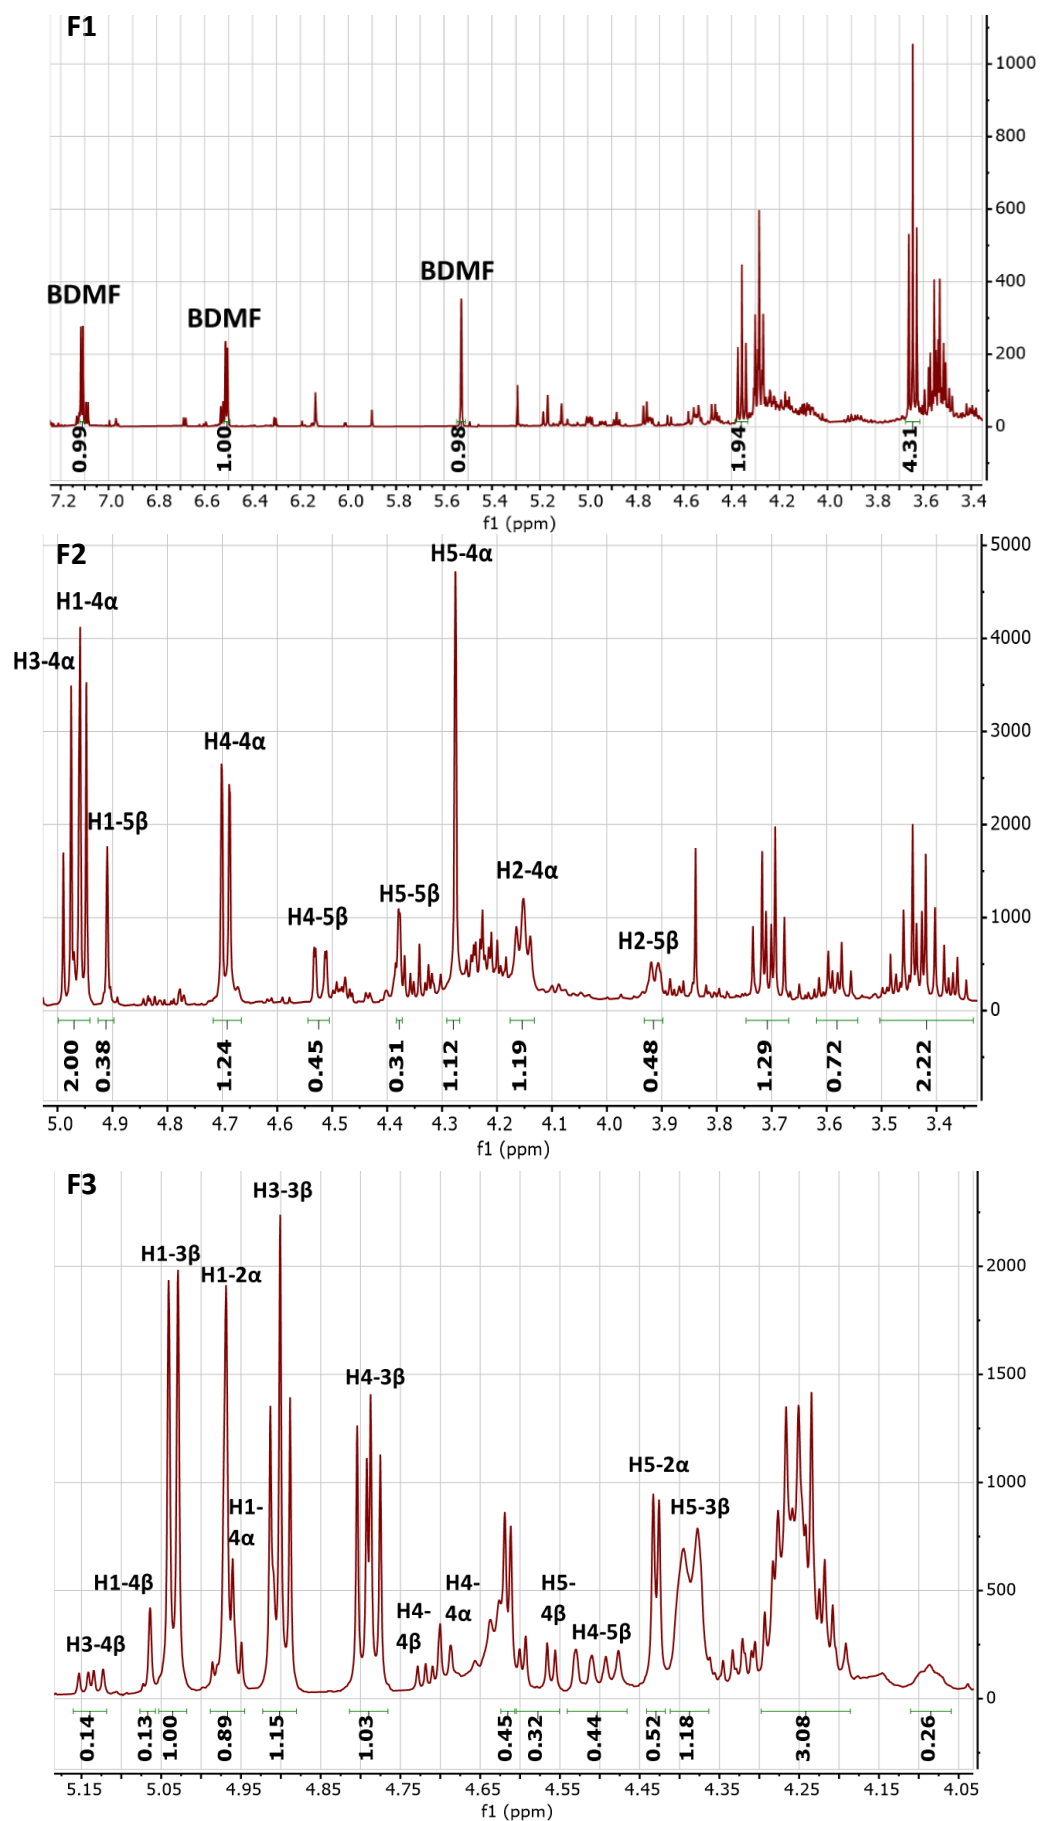

**Figure S3:** Zooms of  $^1\text{H}$  NMR spectra of fractions **F1**, **F2** and **F3** isolated after column chromatography of **C<sub>4</sub>-C<sub>4</sub> Man** from OM (400 MHz,  $\text{CDCl}_3$ ).

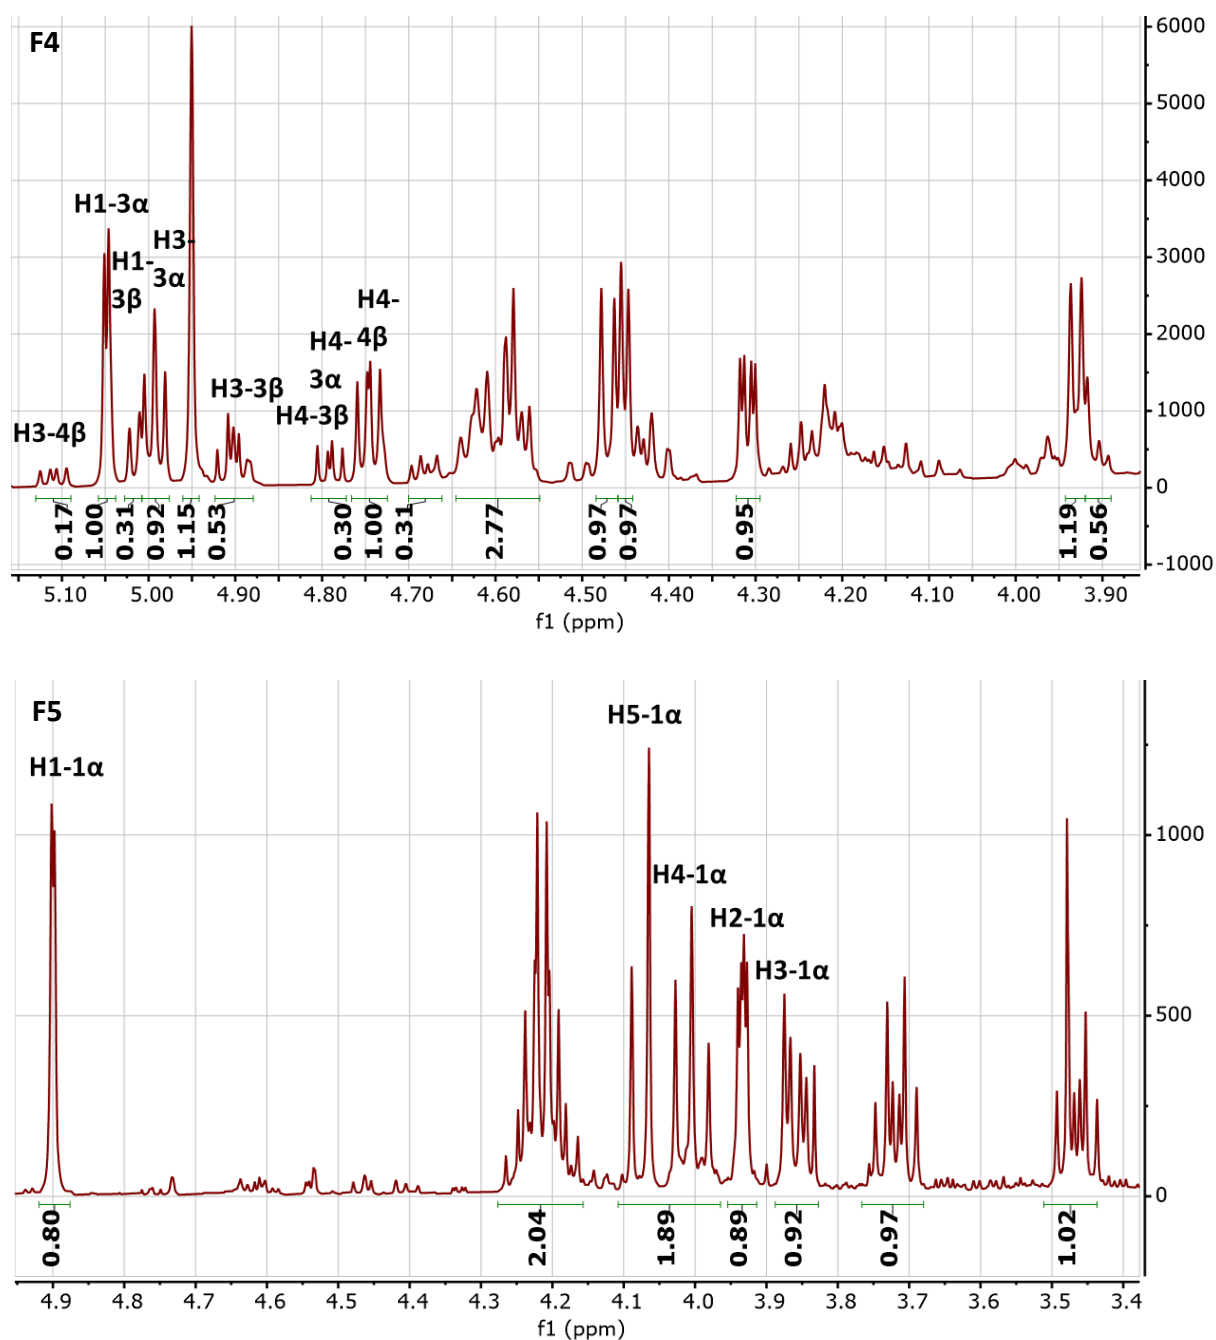

**Figure S4:** Zooms of  $^1\text{H}$  NMR spectra of **fractions F4 and F5** isolated after column chromatography of **C<sub>4</sub>-C<sub>4</sub> Man** from OM (400 MHz,  $\text{CDCl}_3$ ).

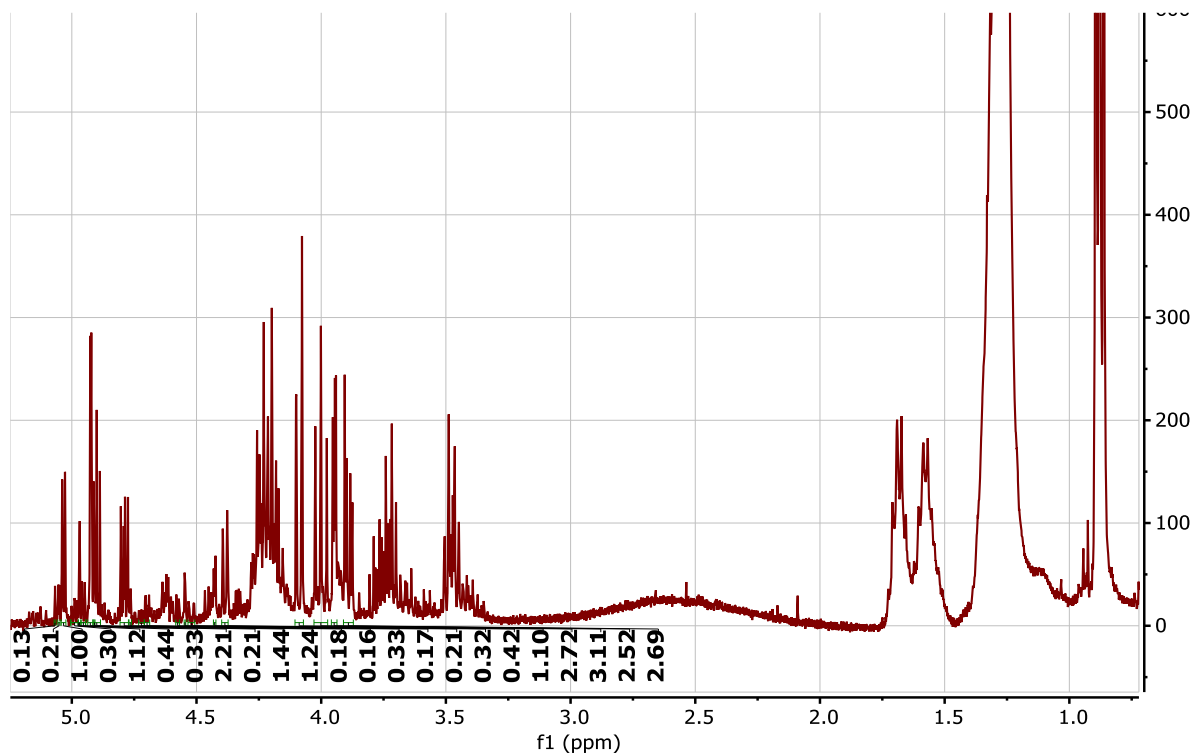

**Figure S5:**  $^1\text{H}$  NMR spectrum of  $\text{C}_{12}\text{-C}_{12}$  Man from OM ( $\delta$ : 5.2-0.6 ppm) (400 MHz,  $\text{CDCl}_3$ ).

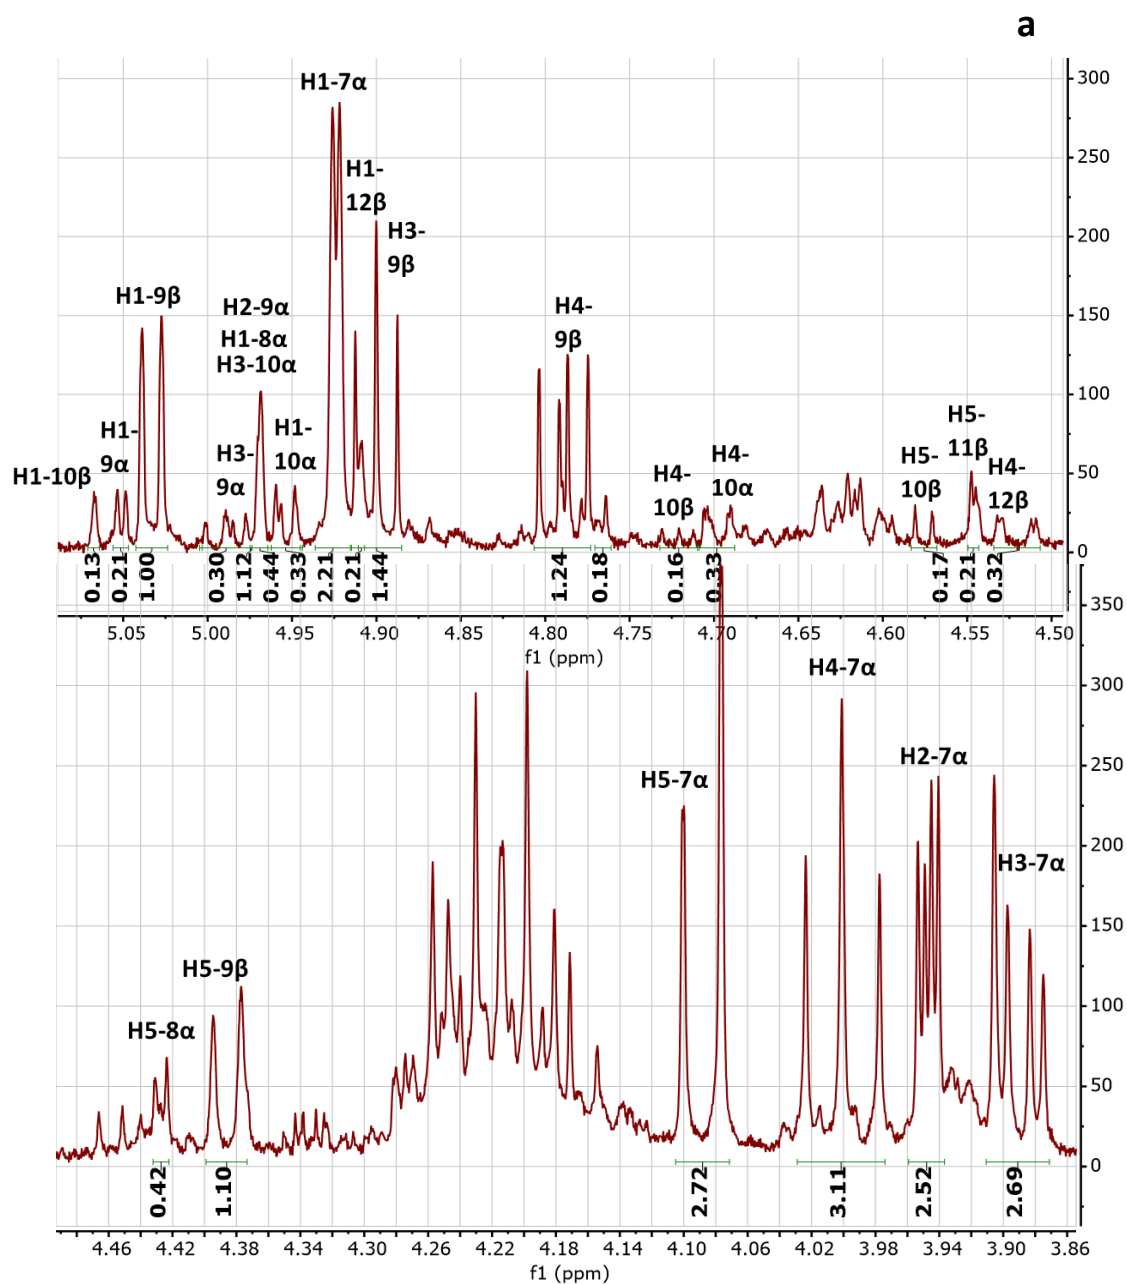

**Figure S6:** Zooms of  $^1\text{H}$  NMR spectrum of  $\text{C}_{12}\text{-C}_{12}$  **Man** from OM in the zones: (a) 5.15-4.50 ppm; (b) 4.50-3.86 ppm (400 MHz,  $\text{CDCl}_3$ ).



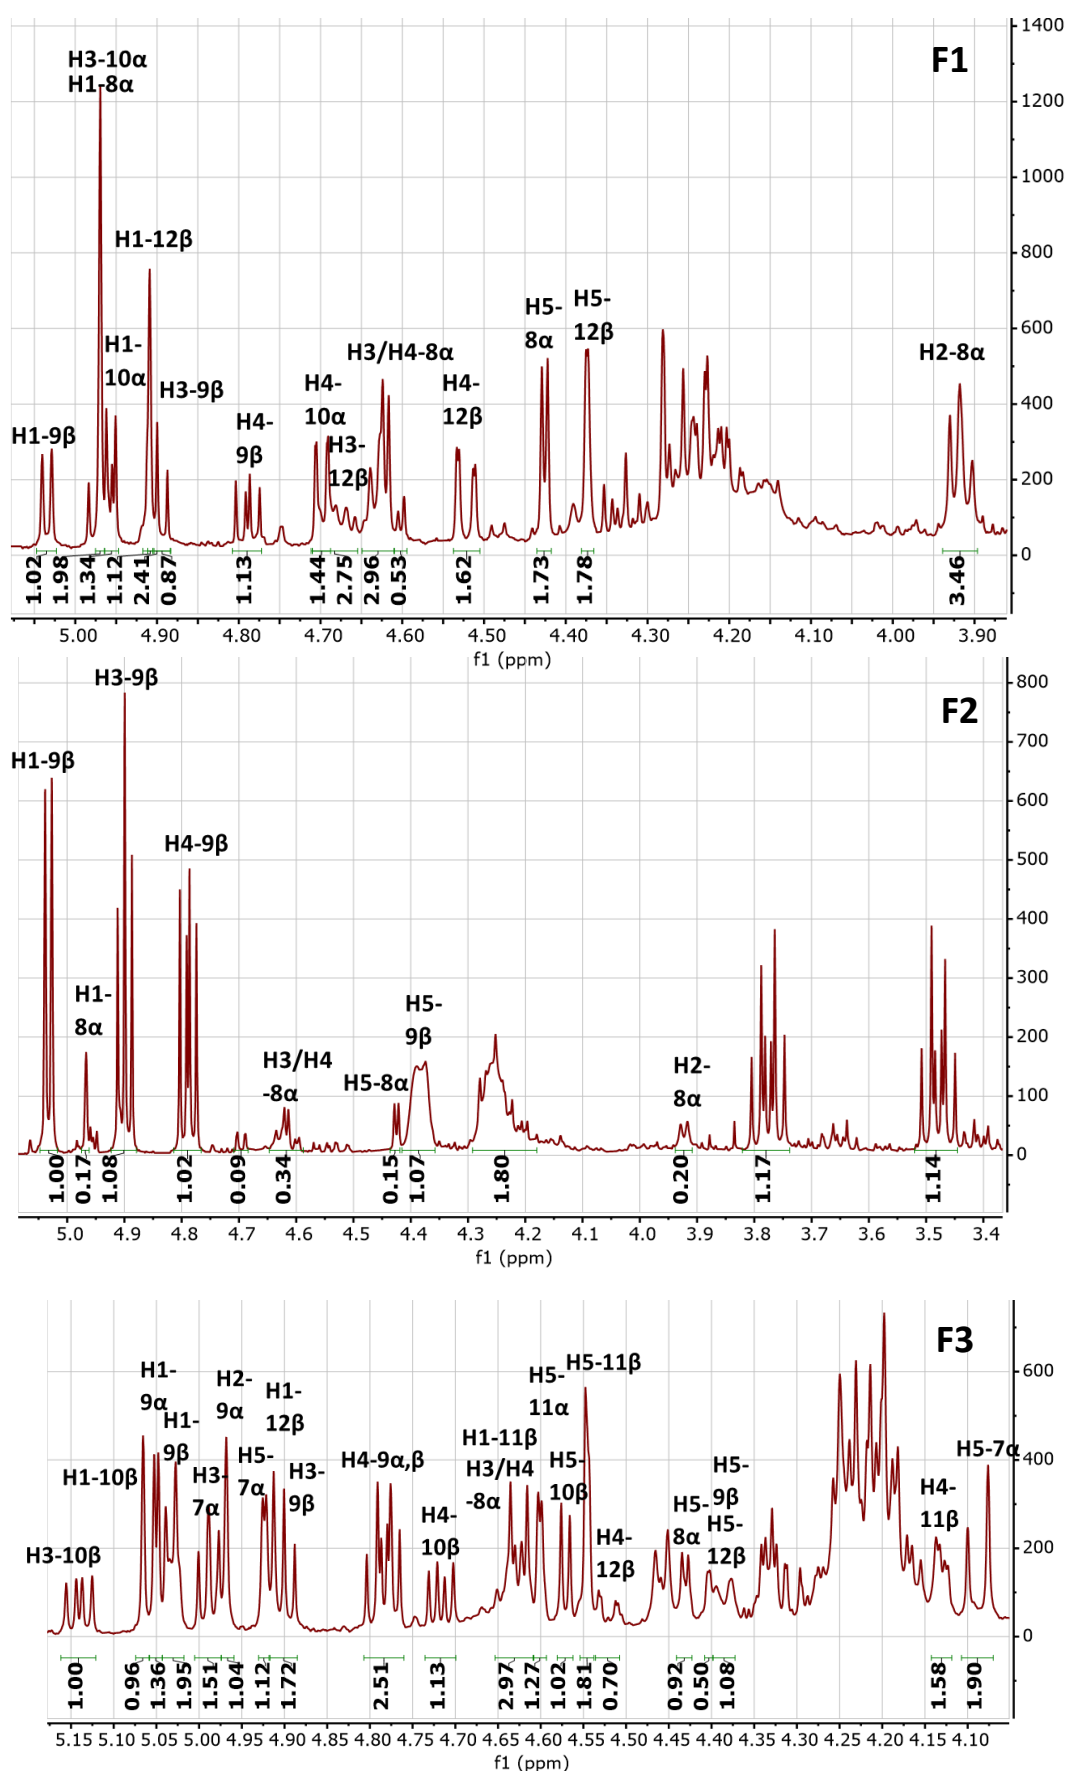

**Figure S7:** Zooms of  $^1\text{H}$  NMR spectra of fractions **F1**, **F2** and **F3** isolated after the second column chromatography of **C<sub>12</sub>-C<sub>12</sub> Man** from OM (400 MHz,  $\text{CDCl}_3$ ).

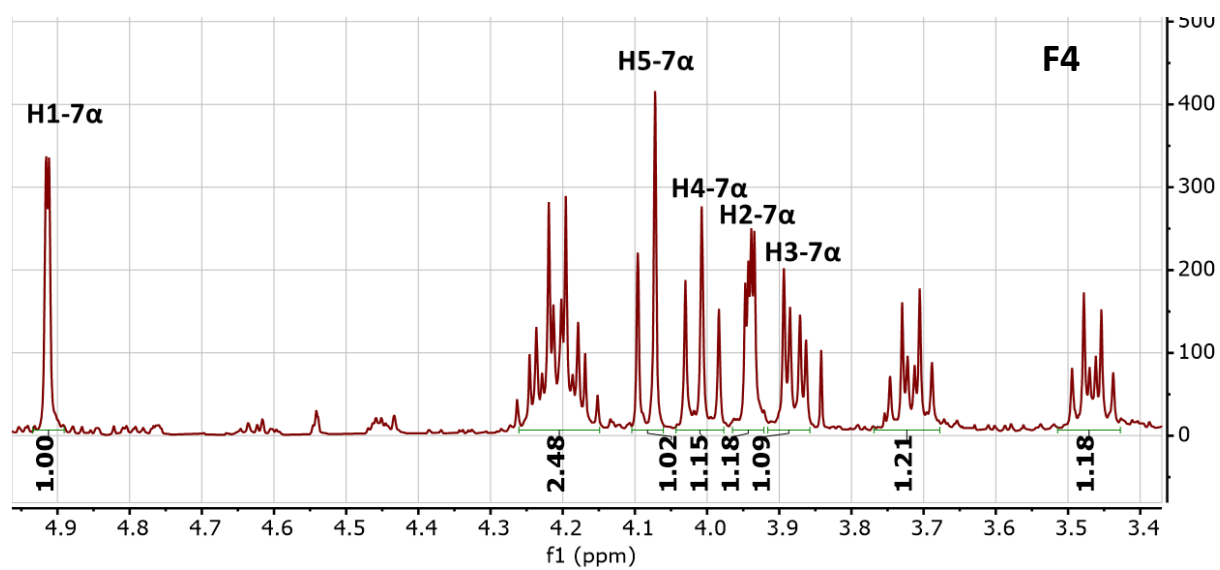

**Figure S8:** Zoom of  $^1\text{H}$  NMR spectrum of **fraction F4** isolated after column chromatography of **C<sub>12</sub>-C<sub>12</sub> Man** from OM (400 MHz,  $\text{CDCl}_3$ ).

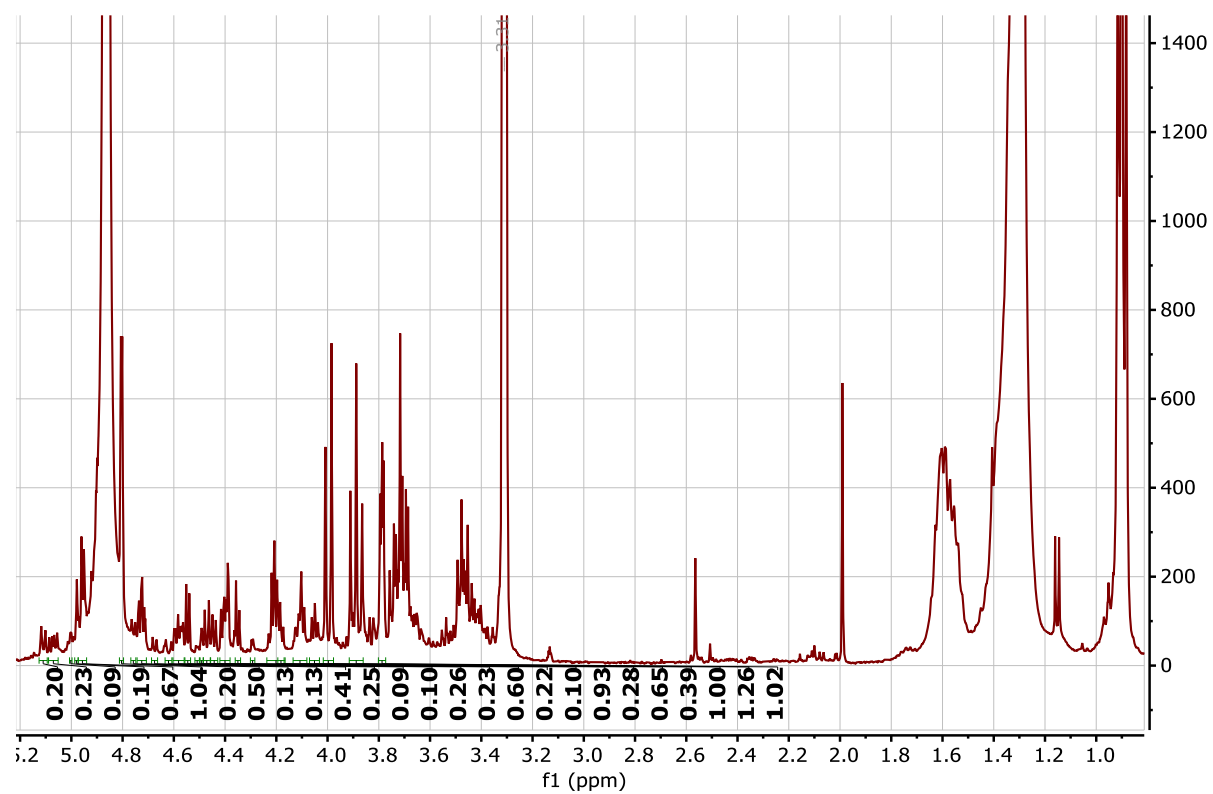

**Figure S9:**  $^1\text{H}$  NMR spectrum of H-C<sub>12</sub> Man from OM ( $\delta$ : 5.2-0.6 ppm) (400 MHz, CD<sub>3</sub>OD).

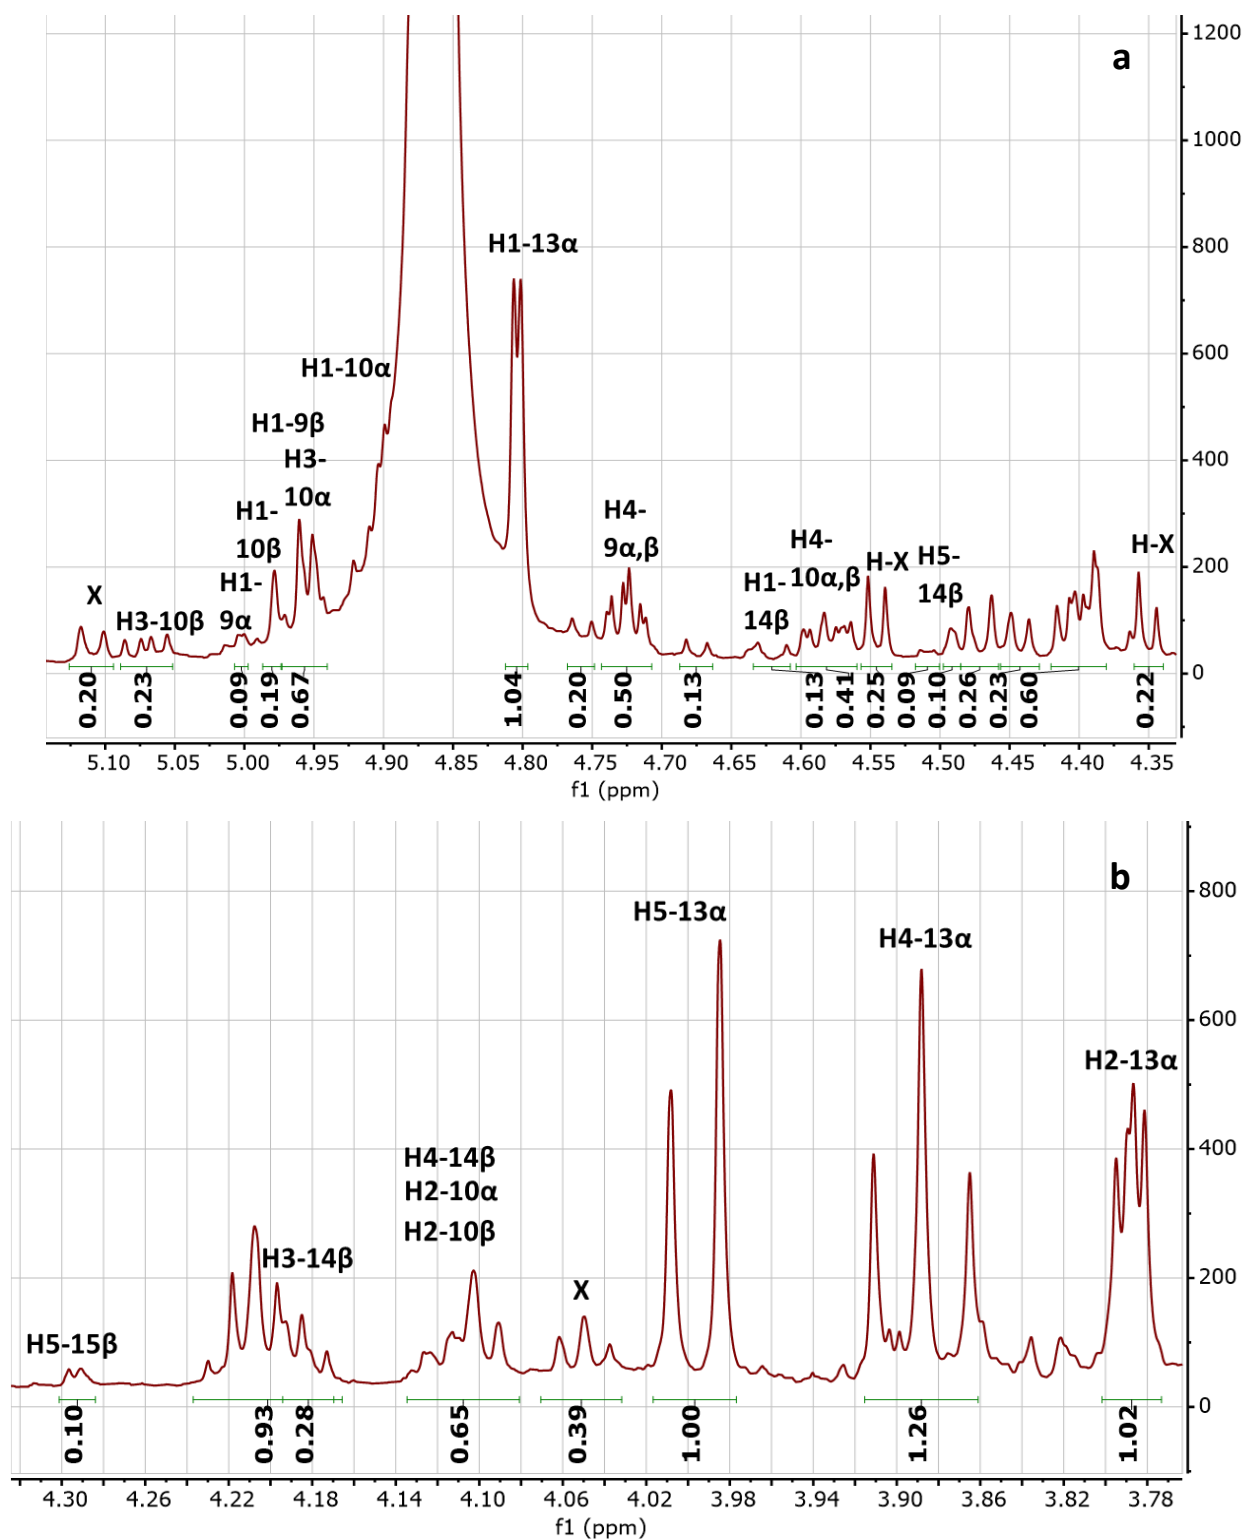

**Figure S10:** Zooms of  $^1\text{H}$  NMR spectrum of **H-C<sub>12</sub> Man** from OM in the zones: (a) 5.15-4.35 ppm; (b) 4.35-3.77 ppm (400 MHz,  $\text{CD}_3\text{OD}$ ).

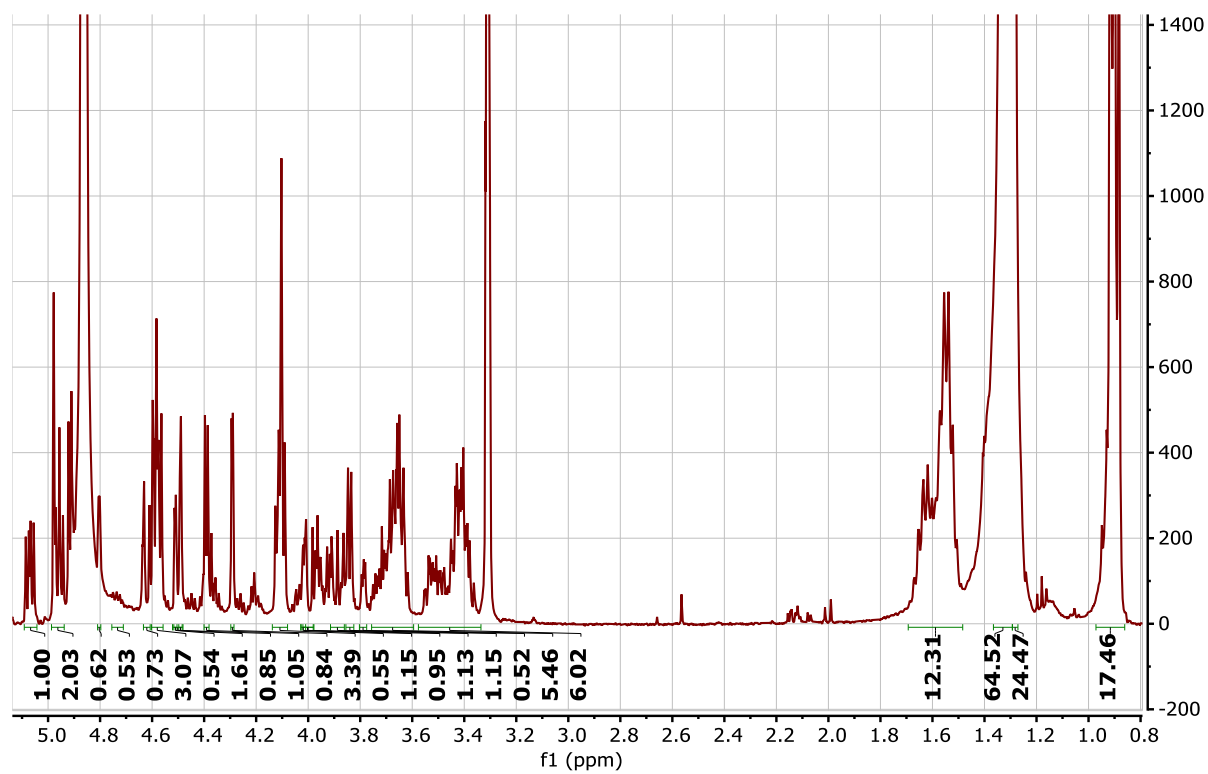

**Figure S11:**  $^1\text{H}$  NMR spectrum of **H-C<sub>12</sub> Gul** from OG ( $\delta$ : 5.2-0.6 ppm) (400 MHz,  $\text{CD}_3\text{OD}$ ).

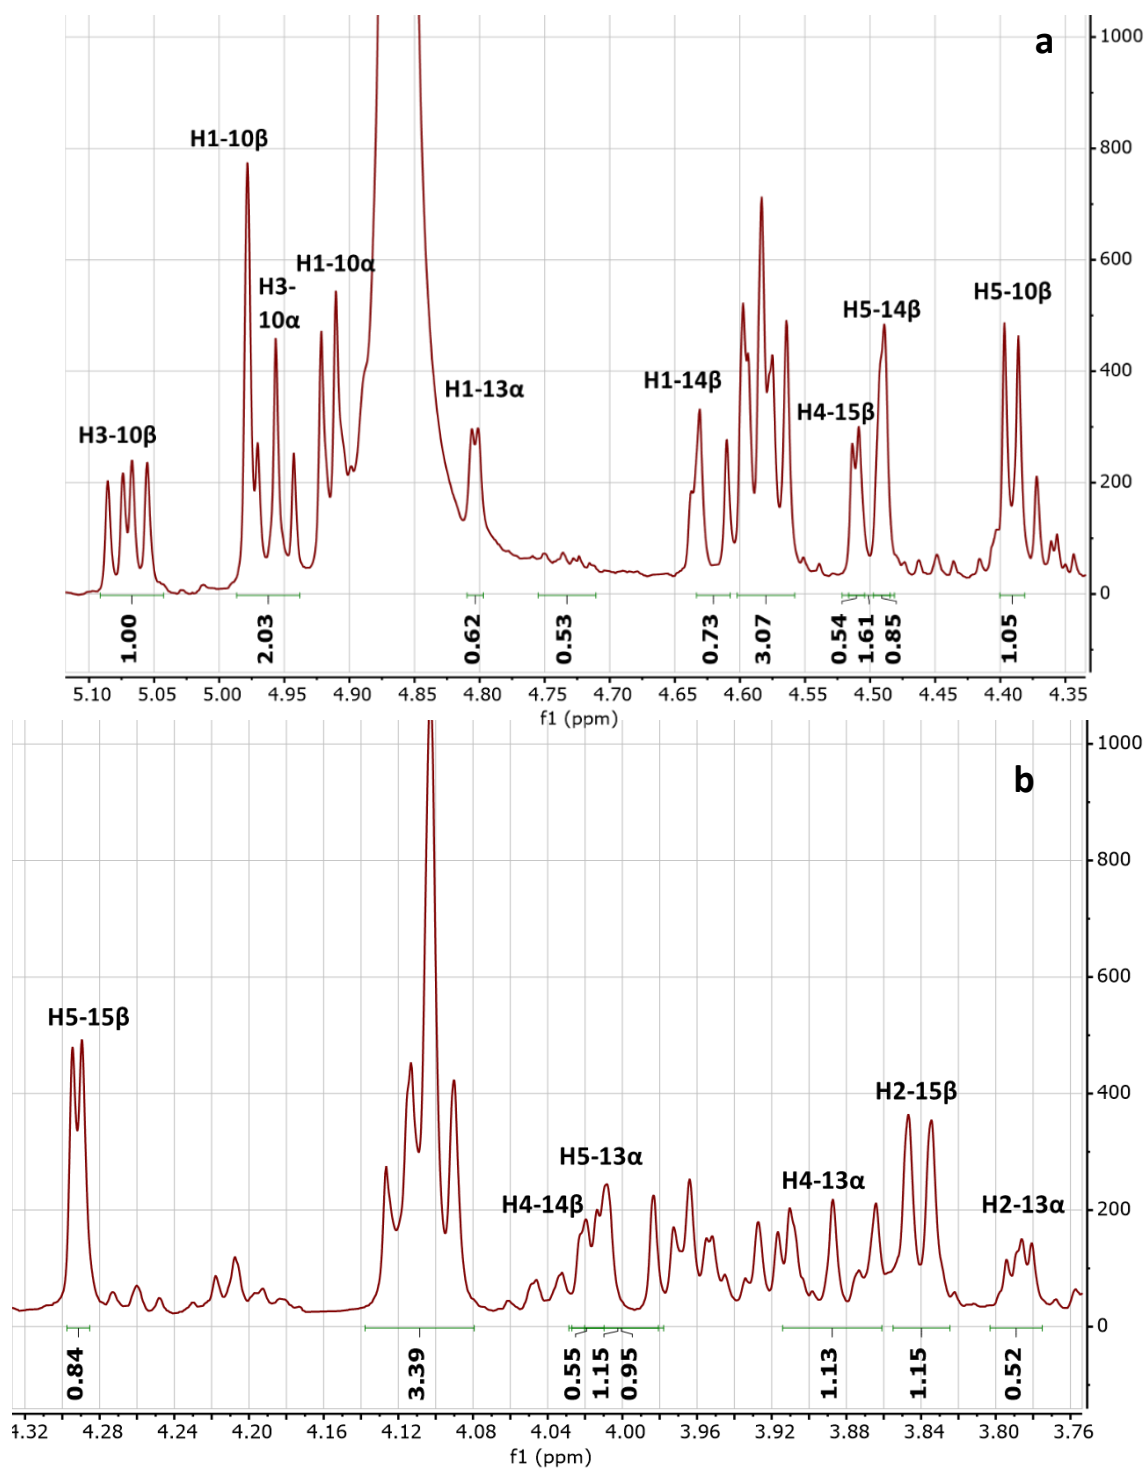

**Figure S12:** Zooms of  $^1\text{H}$  NMR spectrum of **H-C<sub>12</sub> Gul** from OG in the zones: (a) 5.15-4.35 ppm; (b) 4.32-3.76 ppm (400 MHz,  $\text{CD}_3\text{OD}$ ).

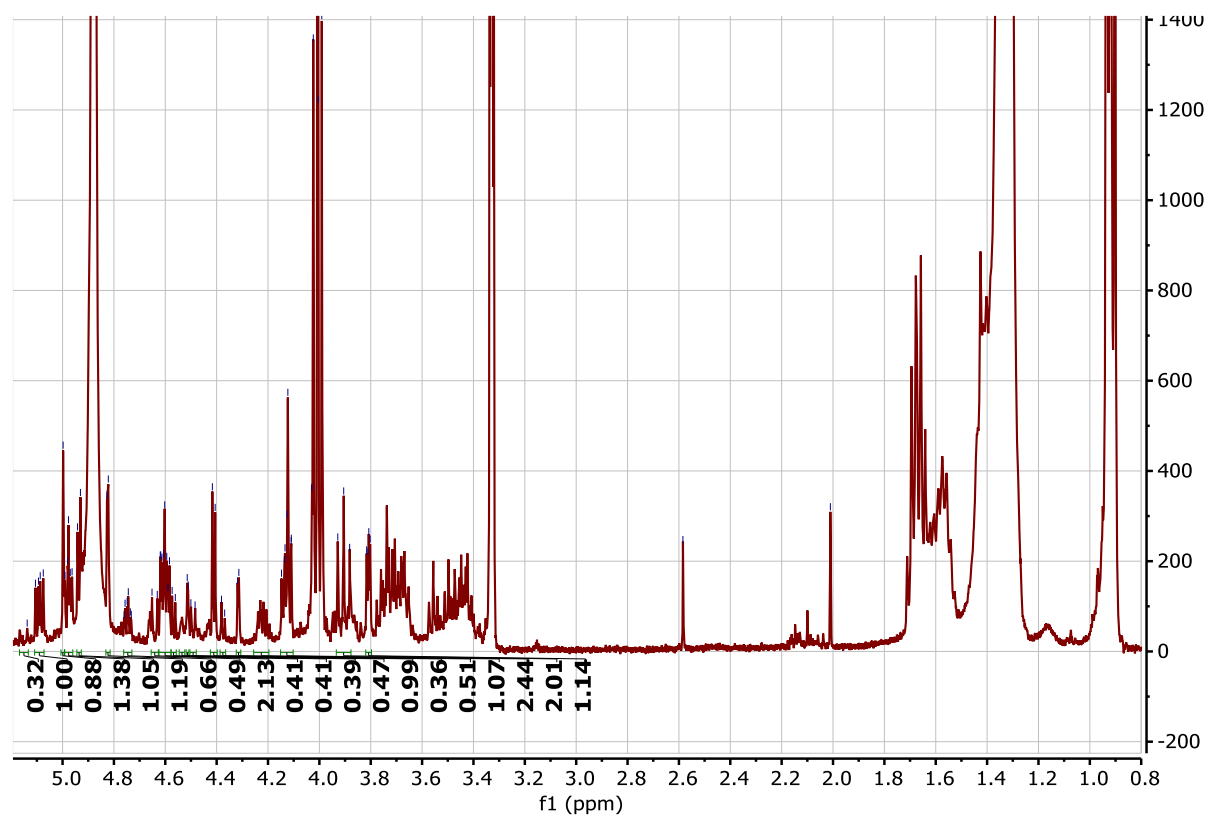

**Figure S13:**  $^1\text{H}$  NMR spectrum of H-C<sub>12</sub> OAlg from OAlg ( $\delta$ : 5.2-0.6 ppm) (400 MHz, CD<sub>3</sub>OD).

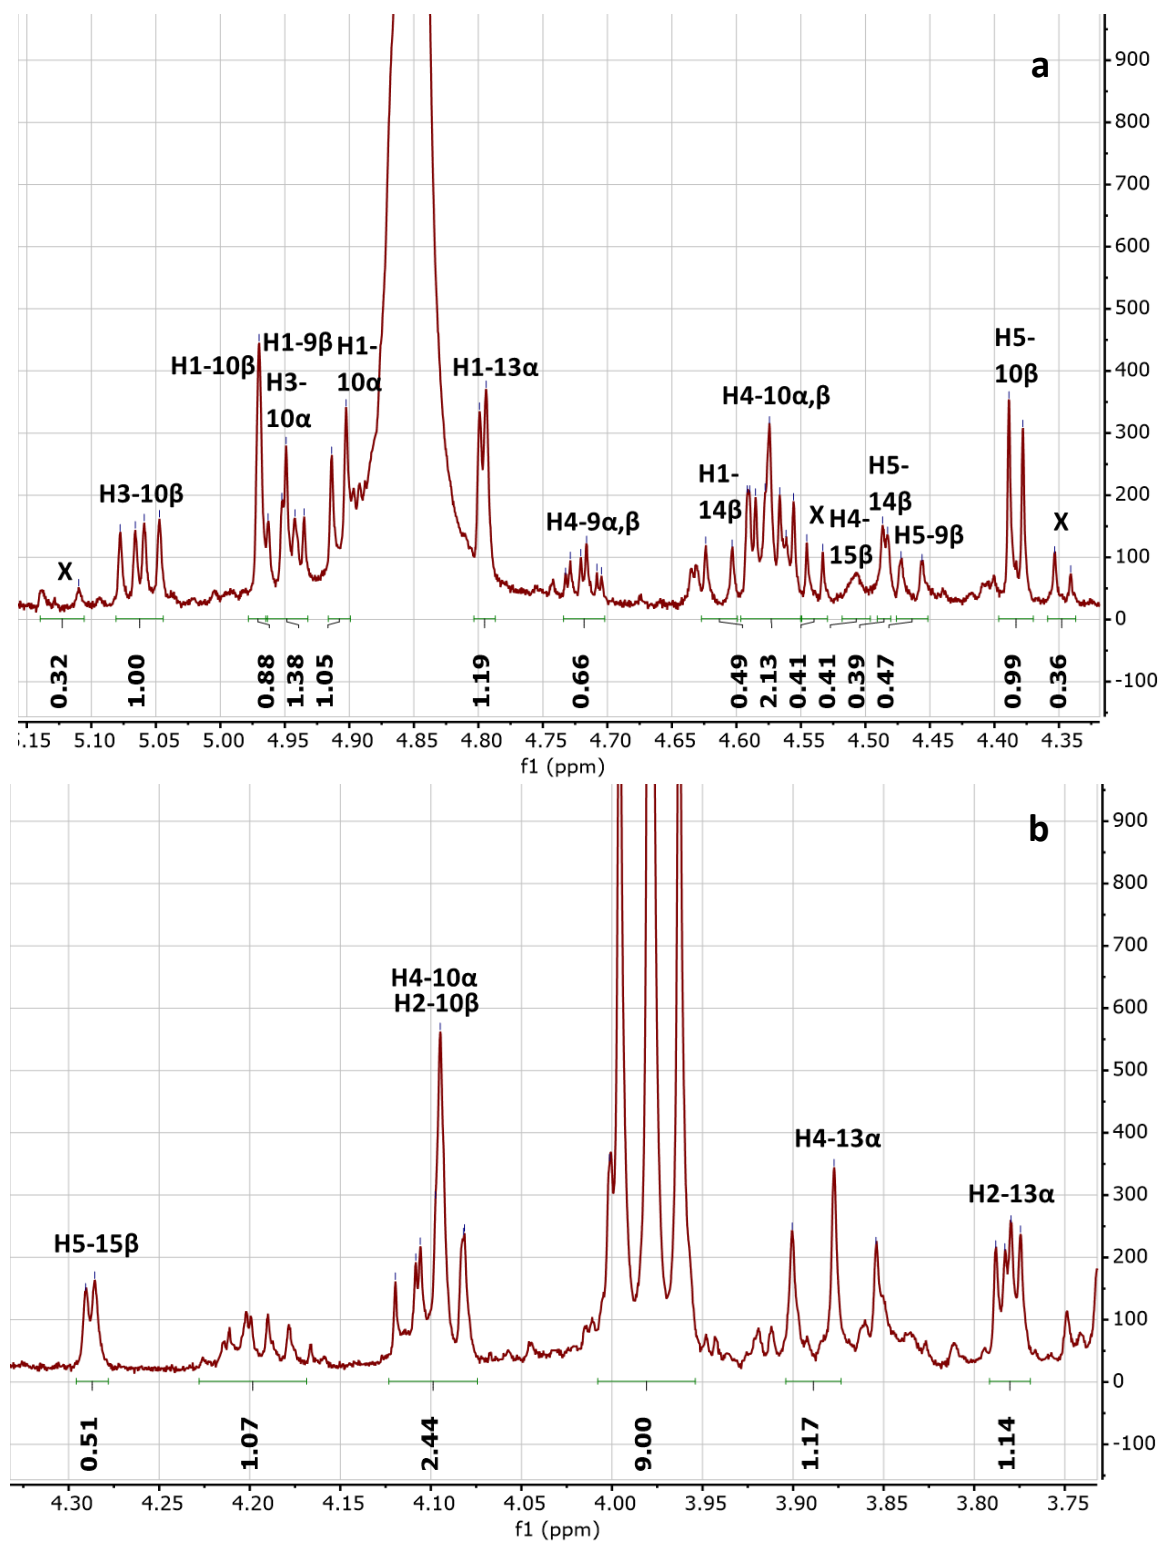

**Figure S14:** Zooms of  $^1\text{H}$  NMR spectrum of **H-C<sub>12</sub> OAlg** from OAlg in the zones: (a) 5.15-4.35 ppm; (b) 4.32-3.74 ppm (400 MHz,  $\text{CD}_3\text{OD}$ ).



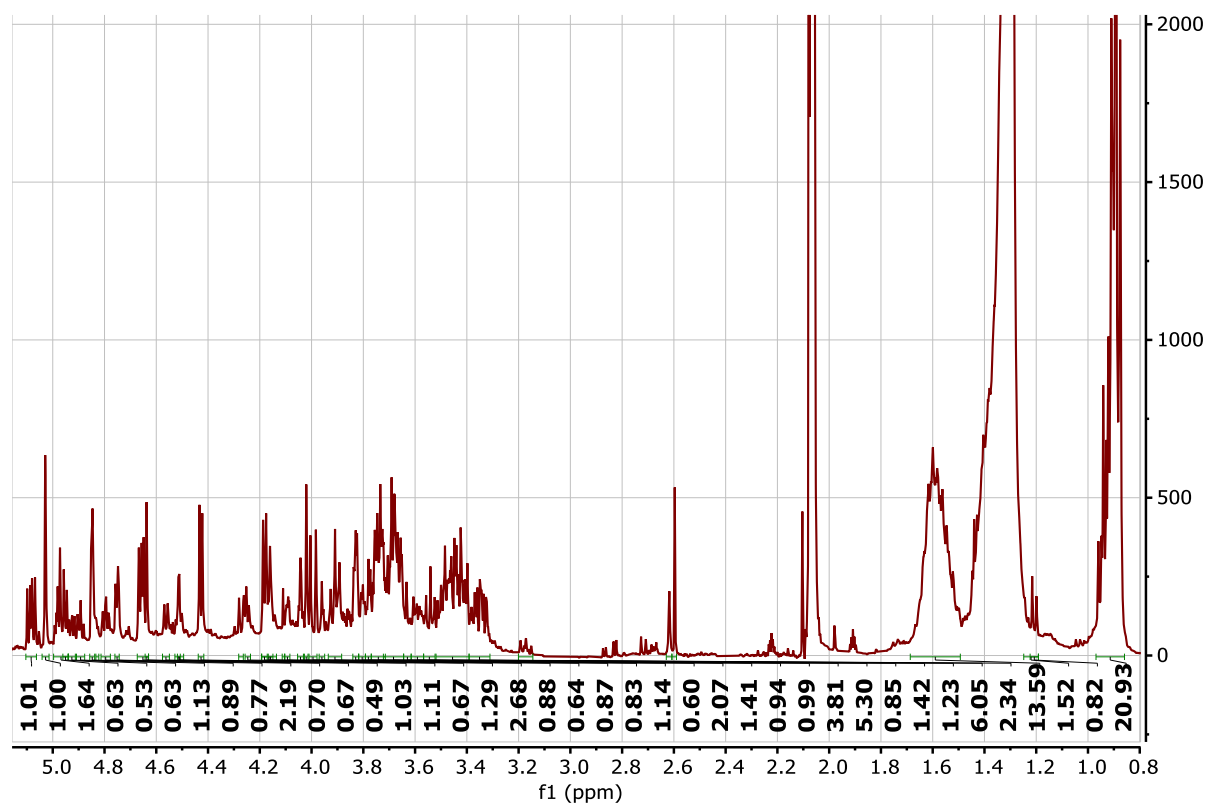

**Figure S15:**  $^1\text{H}$  NMR spectrum of  $\text{H-C}_{12}$  s-r Alg from s-r Alg ( $\delta$ : 5.2-0.6 ppm) (400 MHz,  $\text{acetone-d}_6$ ).

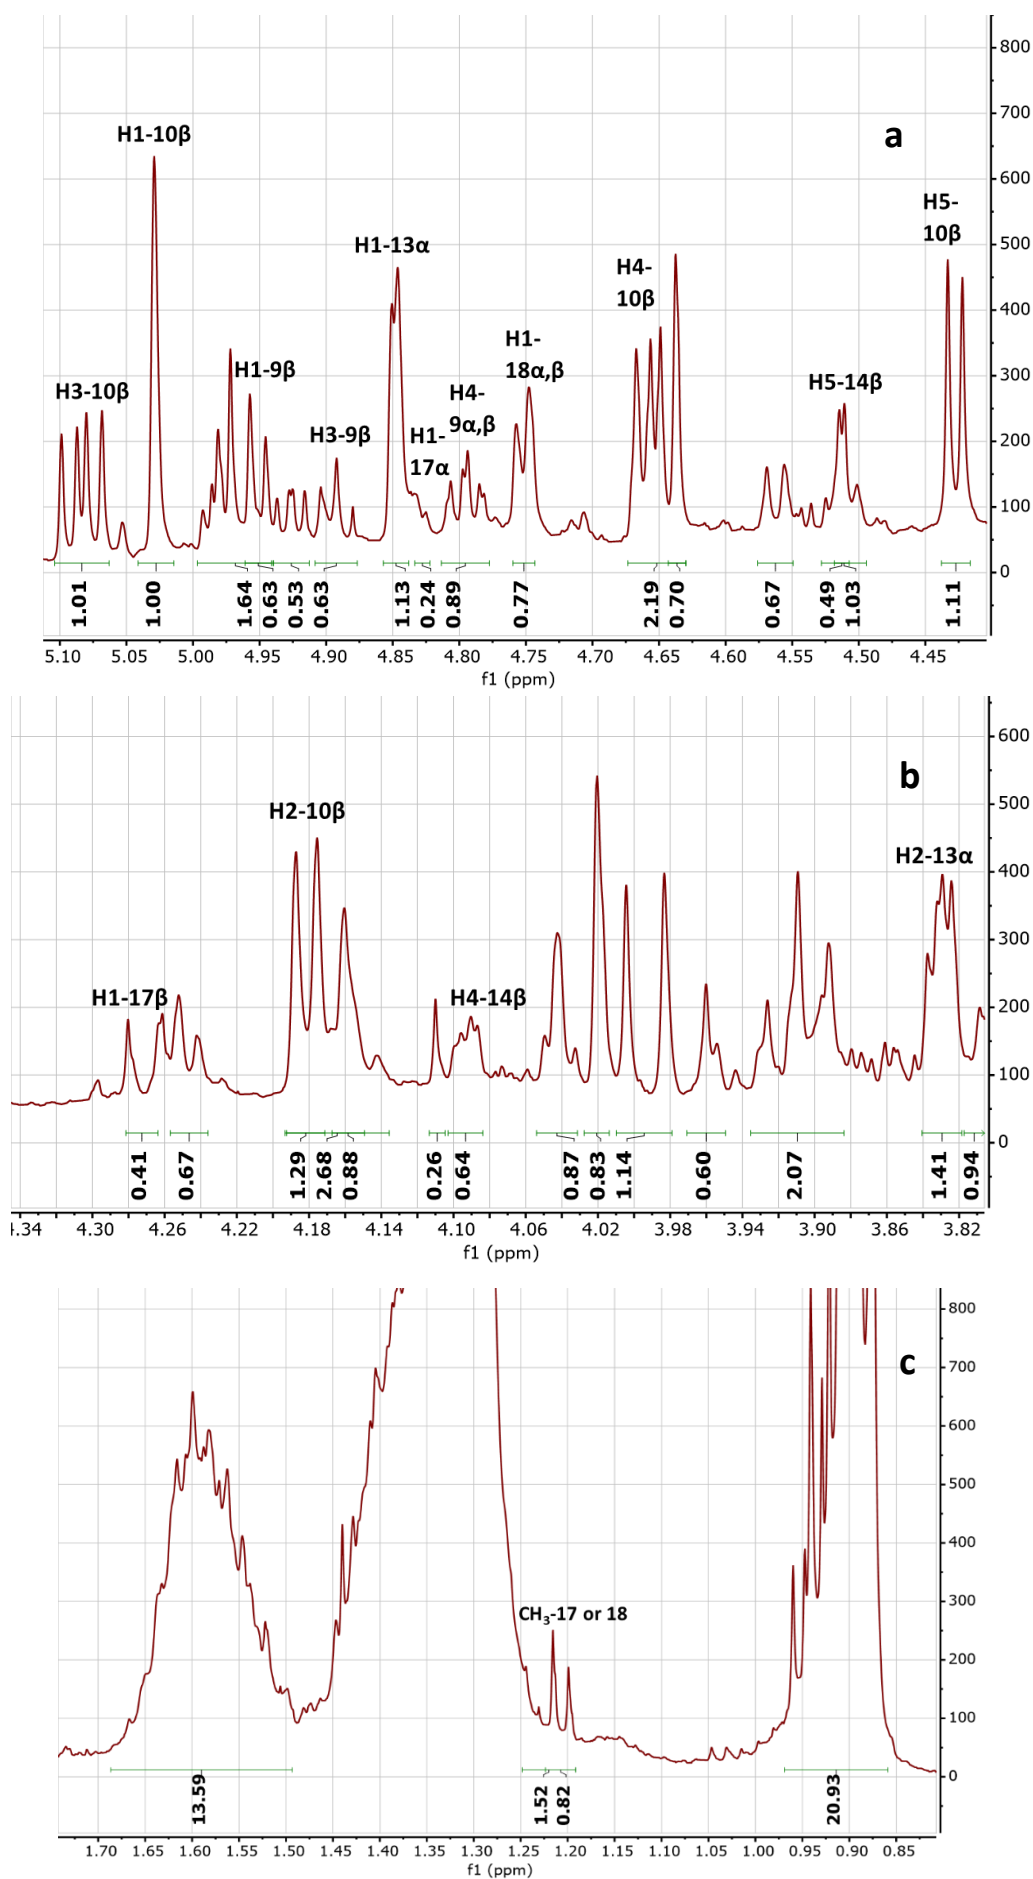

**Figure S16:** Zooms of  $^1\text{H}$  NMR spectrum of **H-C<sub>12</sub> s-r Alg** from s-r Alg in the zones: (a) 5.10-4.40 ppm; (b) 4.34-3.81 ppm; (c) 1.75-0.80 ppm (400 MHz, acetone- $d_6$ ).

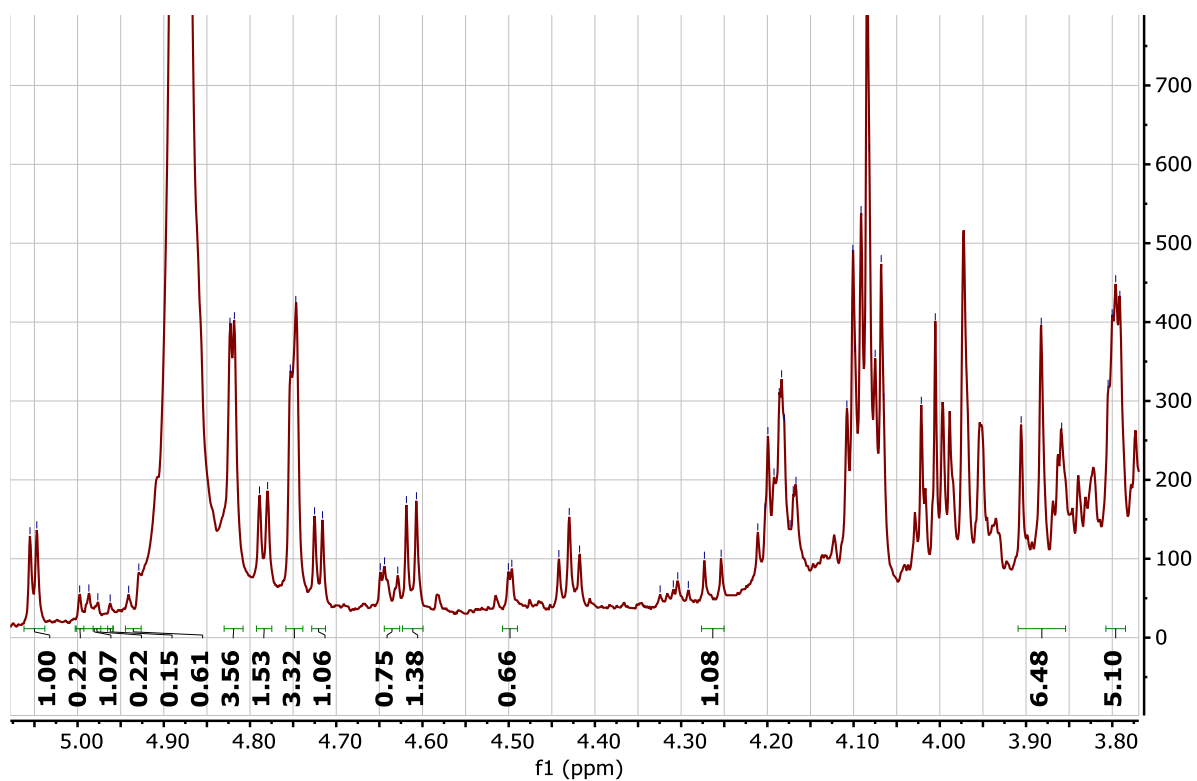

**Figure S17:**  $^1\text{H}$  NMR spectrum of **H-C<sub>8</sub> crude Alg** from crude Alg ( $\delta$ : 5.20-3.80 ppm) (400 MHz,  $\text{CD}_3\text{OD}$ ).

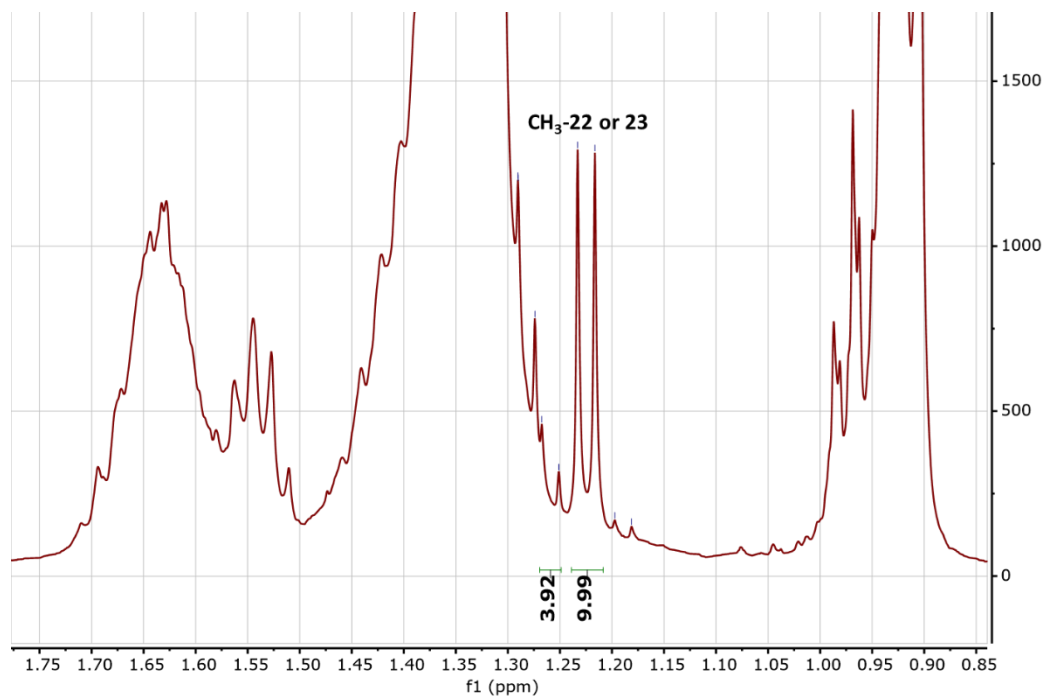

**Figure S18:** Zoom of  $^1\text{H}$  NMR spectrum of **H-C<sub>8</sub> crude Alg** from crude Alg in the zone 1.76-0.85 (400 MHz,  $\text{CD}_3\text{OD}$ ).

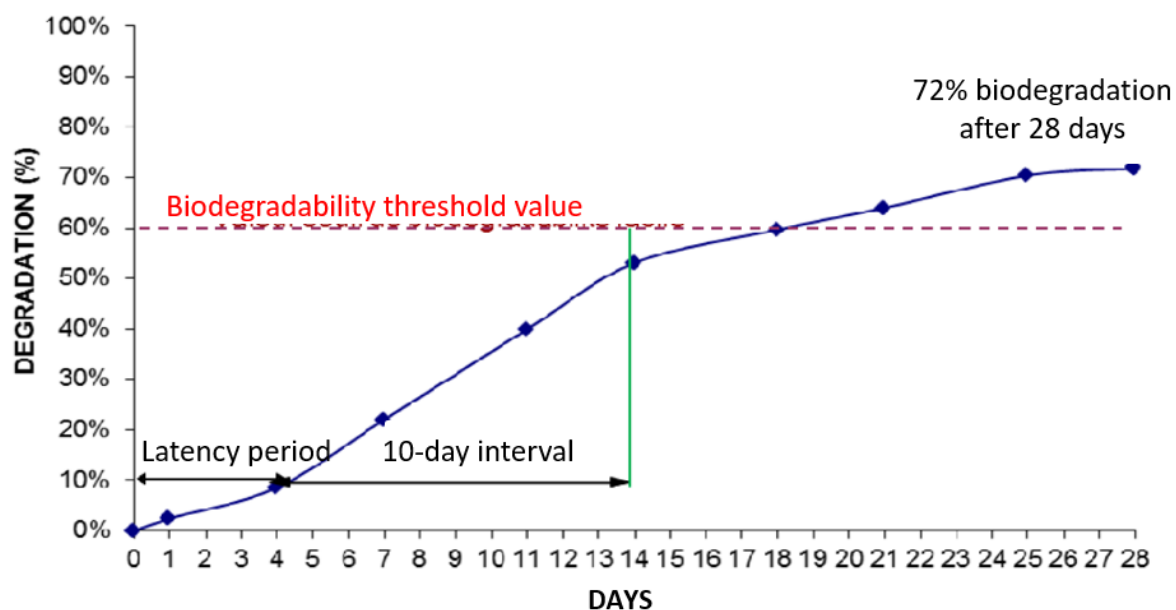

Figure S19: Biodegradability results (H-C12 s-r Alg) according to the OCDE 301 B method.

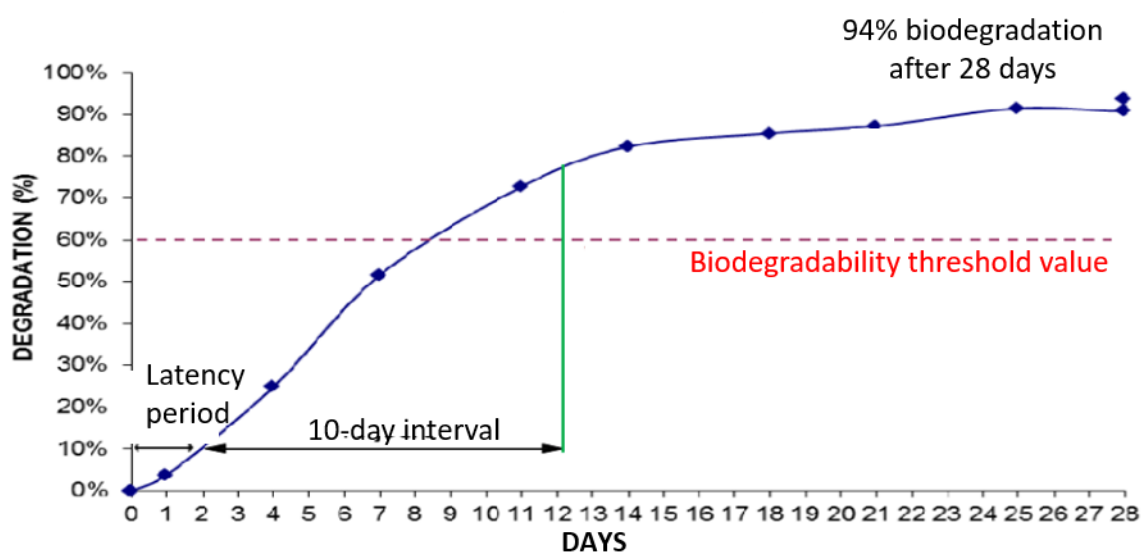

Figure S20: Biodegradability results (SLES) according to the OCDE 301 B method.
